# Supplementary material for: Assessment of Follow-up Care After Emergency Department Presentation for Mild Traumatic Brain Injury and Concussion: Results From the TRACK-TBI Study
Source: PubMed Central journal article supplement (PMC6324305; doi:10.1001/jamanetworkopen.2018.0210), 2018-05-25
Supplement: jamanetwopen-1-e180210-s001.pdf [file jamanetwopen-1-e180210-s001.pdf]

## Supplementary Online Content

Seabury SA, Gaudette É, Goldman DP, et al; TRACK-TBI Investigators. Assessment of follow-up care after emergency department presentation for mild traumatic brain injury and concussion: results from the TRACK-TBI study. *JAMA Netw Open*. 2018;1(1):e180210. doi:10.1001/jamanetworkopen.2018.0210

**eTable.** Patient and Injury Characteristics: Full Sample and Subsample With Complete Follow-up Survey Responses at 2 Weeks and 3 Months

This supplementary material has been provided by the authors to give readers additional information about their work.

In the eTable we report the summary statistics for the full set of subjects age  $\geq 18$  years with mTBI who were enrolled between February 26, 2014 and August 25, 2016 and compare them to the subsample who completed follow-up and answered the questions about educational materials and having seen a provider at 2 weeks and at 3 months, and finally the subsample that completed both sets of questions.

**eTable.** Patient and Injury Characteristics: Full Sample and Subsample with Complete Follow-Up Survey Responses at 2 weeks and 3 months

|                                | Full Sample |        | Subsample that Answered Follow-up Questions at 2 Weeks |        | Subsample that Answered Follow-up Questions at 3 months |        | Subsample Included in the study - Answered Follow-up Questions at 2 Weeks and 3 months |        |
|--------------------------------|-------------|--------|--------------------------------------------------------|--------|---------------------------------------------------------|--------|----------------------------------------------------------------------------------------|--------|
| N                              | 1316        |        | 1017                                                   |        | 919                                                     |        | 831                                                                                    |        |
| <b>Patient Characteristics</b> |             |        |                                                        |        |                                                         |        |                                                                                        |        |
| Female                         | 448         | (34%)  | 350                                                    | (34%)  | 320                                                     | (35%)  | 289                                                                                    | (35%)  |
| Non-Hispanic white             | 728         | (55%)  | 570                                                    | (56%)  | 537                                                     | (58%)  | 483                                                                                    | (58%)  |
| Average age (s.d.)             | 40.5        | (17.2) | 39.8                                                   | (16.9) | 40.8                                                    | (17.1) | 40.3                                                                                   | (16.9) |
| 18-64                          | 1171        | (89%)  | 916                                                    | (90%)  | 814                                                     | (89%)  | 743                                                                                    | (89%)  |
| 65+                            | 145         | (11%)  | 101                                                    | (10%)  | 105                                                     | (11%)  | 88                                                                                     | (11%)  |
| <b>Income/Insurance group</b>  |             |        |                                                        |        |                                                         |        |                                                                                        |        |
| Less than \$50K                | 693         | (53%)  | 562                                                    | (55%)  | 504                                                     | (55%)  | 460                                                                                    | (55%)  |
| \$50K+                         | 300         | (23%)  | 256                                                    | (25%)  | 230                                                     | (25%)  | 212                                                                                    | (26%)  |
| Unknown income                 | 323         | (25%)  | 199                                                    | (20%)  | 185                                                     | (20%)  | 159                                                                                    | (19%)  |
| Uninsured (self-pay)           | 274         | (21%)  | 208                                                    | (21%)  | 168                                                     | (18%)  | 153                                                                                    | (18%)  |
| Insured                        | 1042        | (79%)  | 809                                                    | (80%)  | 751                                                     | (82%)  | 678                                                                                    | (82%)  |
| Private insurance              | 672         | (51%)  | 570                                                    | (56%)  | 507                                                     | (55%)  | 468                                                                                    | (56%)  |
| Medicaid                       | 133         | (10%)  | 93                                                     | (9%)   | 103                                                     | (11%)  | 85                                                                                     | (10%)  |
| Medicare                       | 91          | (7%)   | 69                                                     | (7%)   | 70                                                      | (8%)   | 61                                                                                     | (7%)   |
| <b>Injury Severity</b>         |             |        |                                                        |        |                                                         |        |                                                                                        |        |
| Lesion detected on CT scan     | 391         | (30%)  | 296                                                    | (29%)  | 271                                                     | (30%)  | 236                                                                                    | (28%)  |
| Average GCS at arrival (s.d.)  | 14.7        | (0.5)  | 14.8                                                   | (0.5)  | 14.7                                                    | (0.5)  | 14.8                                                                                   | (0.5)  |
| GCS=13                         | 52          | (4%)   | 36                                                     | (4%)   | 31                                                      | (3%)   | 25                                                                                     | (3%)   |
| GCS=14                         | 242         | (18%)  | 180                                                    | (18%)  | 173                                                     | (19%)  | 148                                                                                    | (18%)  |
| GCS=15                         | 1022        | (78%)  | 801                                                    | (79%)  | 715                                                     | (78%)  | 658                                                                                    | (79%)  |
| <b>Mechanism of Injury</b>     |             |        |                                                        |        |                                                         |        |                                                                                        |        |
| Road traffic incident          | 775         | (59%)  | 609                                                    | (60%)  | 543                                                     | (59%)  | 494                                                                                    | (59%)  |
| Incidental fall                | 330         | (25%)  | 247                                                    | (24%)  | 232                                                     | (25%)  | 203                                                                                    | (24%)  |
| Violence/assault               | 82          | (6%)   | 67                                                     | (7%)   | 57                                                      | (6%)   | 52                                                                                     | (6%)   |
| <b>Care Disposition Group</b>  |             |        |                                                        |        |                                                         |        |                                                                                        |        |
| ED Discharge                   | 404         | (31%)  | 342                                                    | (34%)  | 298                                                     | (32%)  | 288                                                                                    | (35%)  |
| Hospital admission - no ICU    | 564         | (43%)  | 434                                                    | (43%)  | 397                                                     | (43%)  | 362                                                                                    | (44%)  |
| Hospital admission - ICU       | 348         | (26%)  | 241                                                    | (24%)  | 224                                                     | (24%)  | 181                                                                                    | (22%)  |
